# Supplementary material
Source: MDPI journal article supplement (https://www.mdpi.com/2079-9276/10/5/45)
Supplement: s1 [file s1]

## Supplementary material

# Valorization of agri-food waste from pistachio hard shells: extraction of polyphenols as natural antioxidants

Nunzio Cardullo, Melania Leanza, Vera Muccilli\* and Corrado Tringali

Department of Chemical Sciences, University of Catania, Viale A. Doria 6, 95125 Catania, Italy;  
[ncardullo@unict.it](mailto:ncardullo@unict.it); [melanialeanza.92@gmail.com](mailto:melanialeanza.92@gmail.com); [ctringali@unict.it](mailto:ctringali@unict.it)

\* Correspondence: [v.muccilli@unict.it](mailto:v.muccilli@unict.it); Tel.: +39 0957385041

**Table S1.** Pearson correlation analysis

|               |               | 1/DPPH     | TEAC       | ORAC       | TPC        | TFC     |
|---------------|---------------|------------|------------|------------|------------|---------|
| <b>1/DPPH</b> | Pearson Corr. | 1          | 0.91909    | 0.94559    | 0.92746    | 0.54415 |
|               | p-value       | --         | 1.28869E-6 | 1.04357E-7 | 6.47002E-7 | 0.03599 |
| <b>TEAC</b>   | Pearson Corr. | 0.91909    | 1          | 0.95605    | 0.88351    | 0.74203 |
|               | p-value       | 1.28869E-6 | --         | 2.67215E-8 | 1.26115E-5 | 0.00154 |
| <b>ORAC</b>   | Pearson Corr. | 0.94559    | 0.95605    | 1          | 0.85706    | 0.63816 |
|               | p-value       | 1.04357E-7 | 2.67215E-8 | --         | 4.46191E-5 | 0.01047 |
| <b>TPC</b>    | Pearson Corr. | 0.92746    | 0.88351    | 0.85706    | 1          | 0.5152  |
|               | p-value       | 6.47002E-7 | 1.26115E-5 | 4.46191E-5 | --         | 0.04937 |
| <b>TFC</b>    | Pearson Corr. | 0.54415    | 0.74203    | 0.63816    | 0.5152     | 1       |
|               | p-value       | 0.03599    | 0.00154    | 0.01047    | 0.04937    | --      |

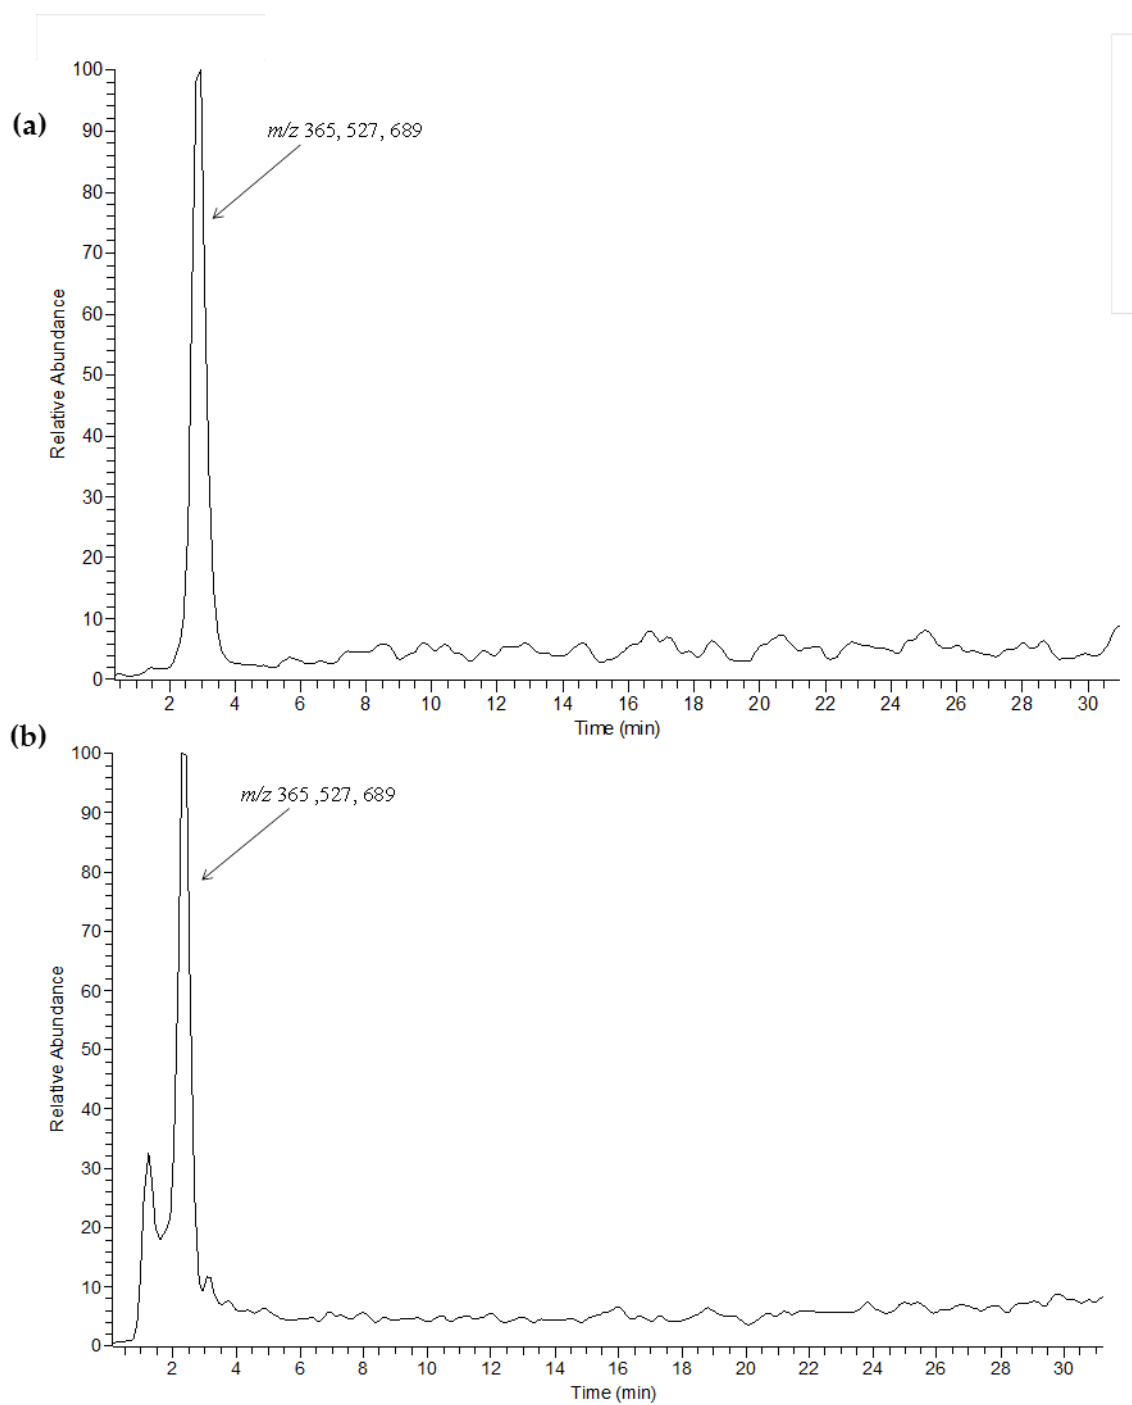

**Figure S1.** HPLC/ESI-MS profile of (a) Fr1 and (b) Fr2.

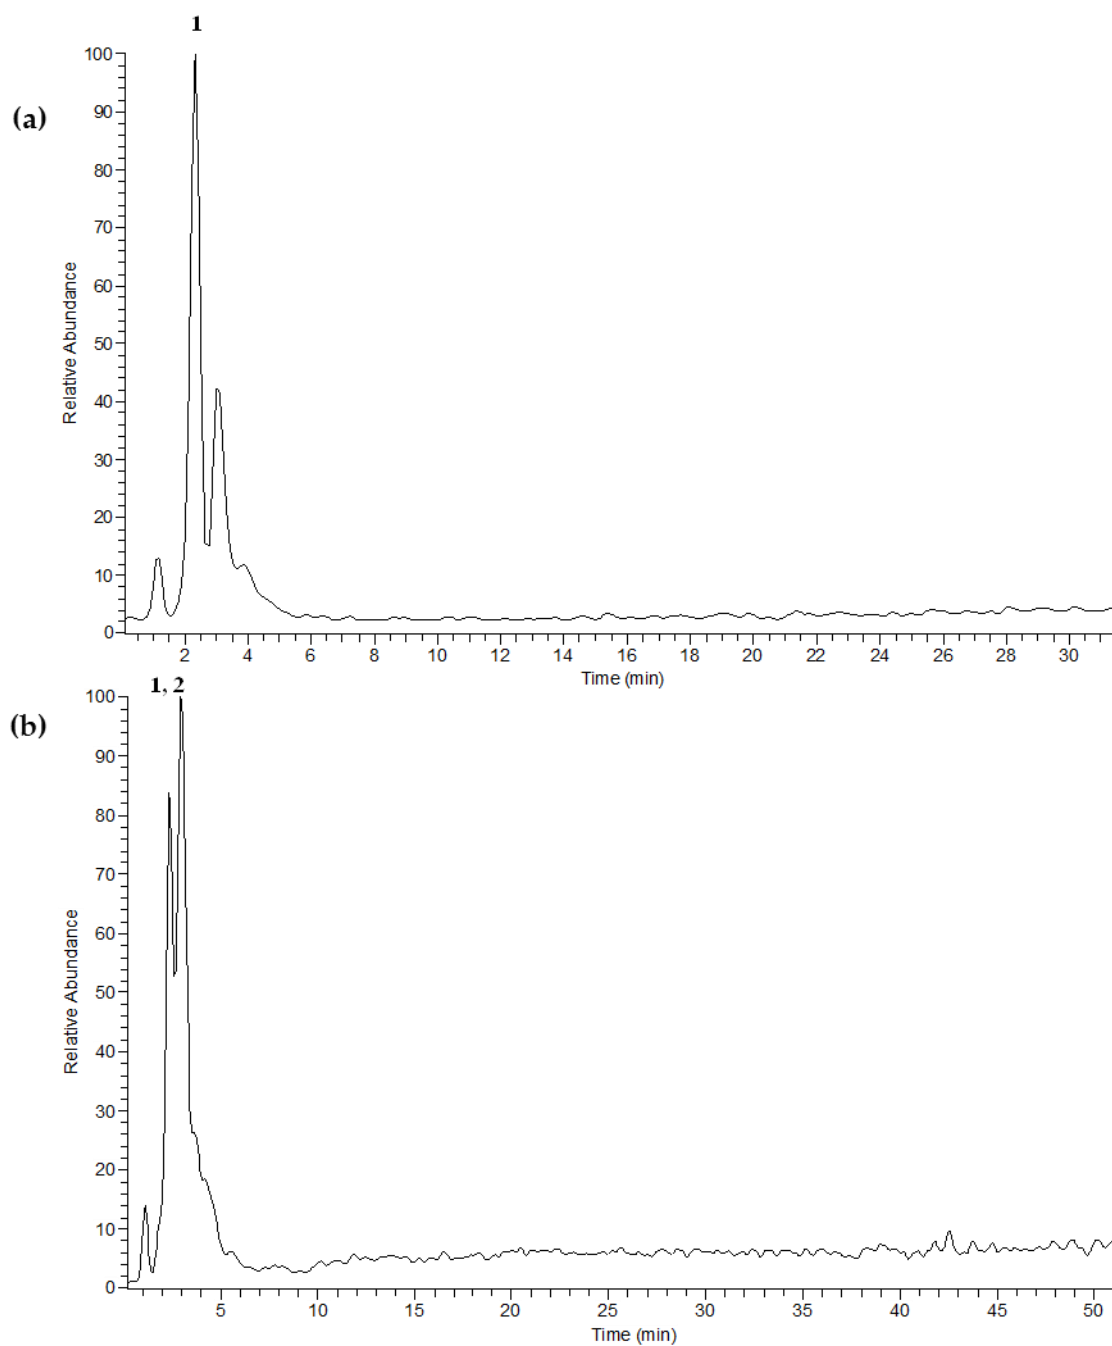

**Figure S2.** HPLC/ESI-MS profile of (a) Fr3 and (b) F4.

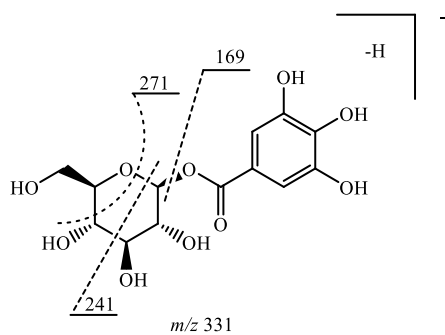

**Figure S3.** MS/MS fragmentation pattern of  $[M-H]^-$  at  $m/z$  331 identified as monogalloylglucose isomer (2).

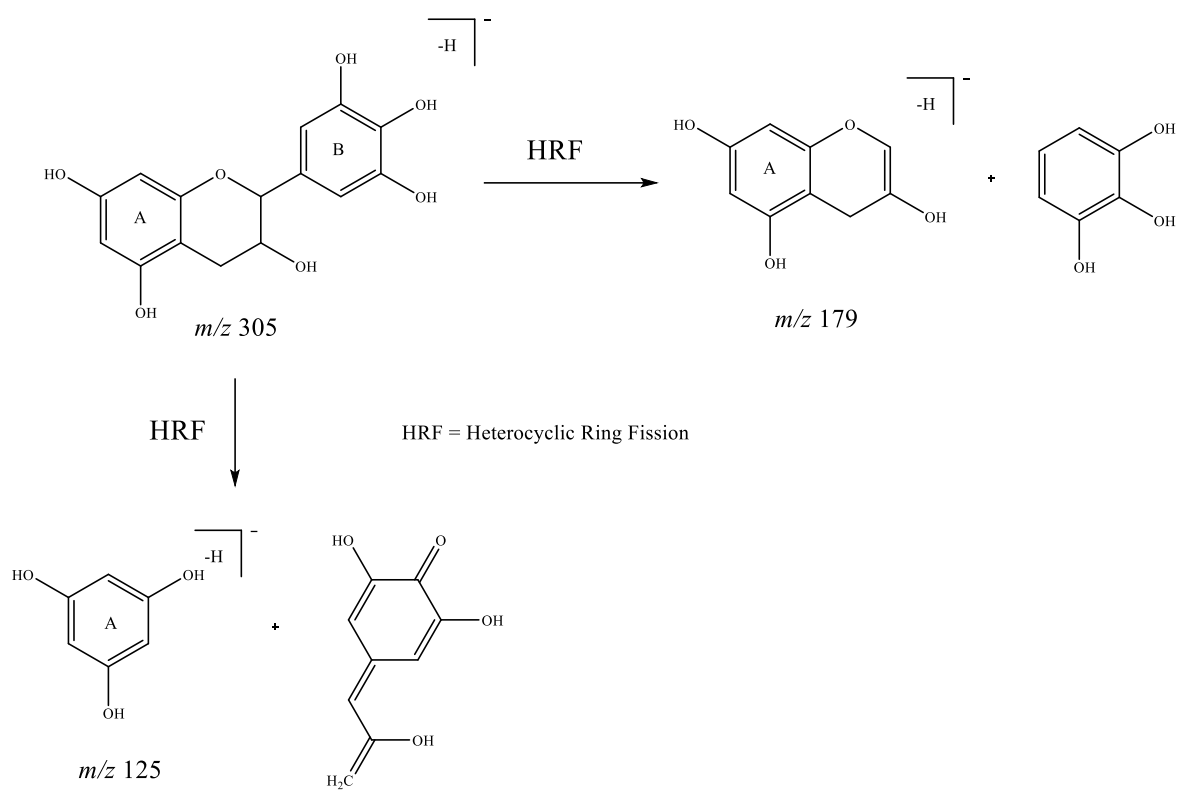

**Figure S4.** MS/MS fragmentation pattern of  $[M-H]^-$  at  $m/z$  305 identified as (+)-gallocatechin (3).

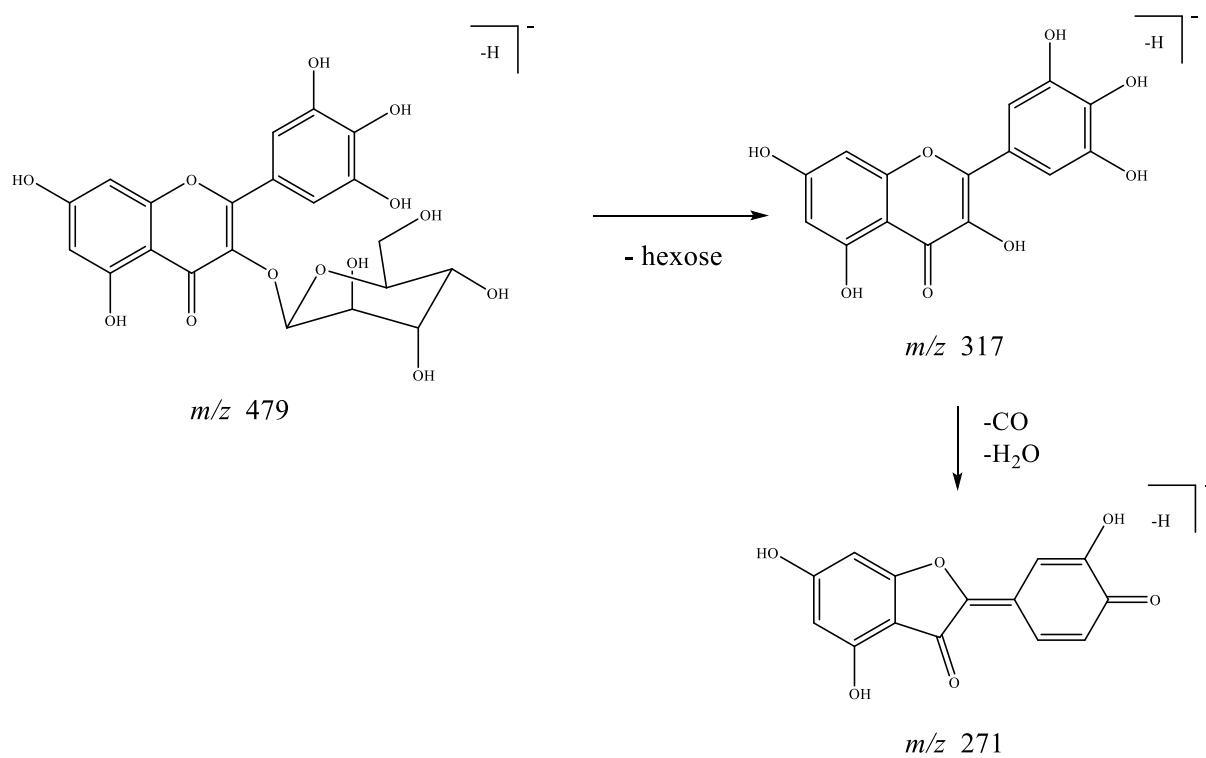

**Figure S5.** MS/MS fragmentation pattern of  $[M-H]^-$  at  $m/z$  479 identified as myricetin hexoside (4).

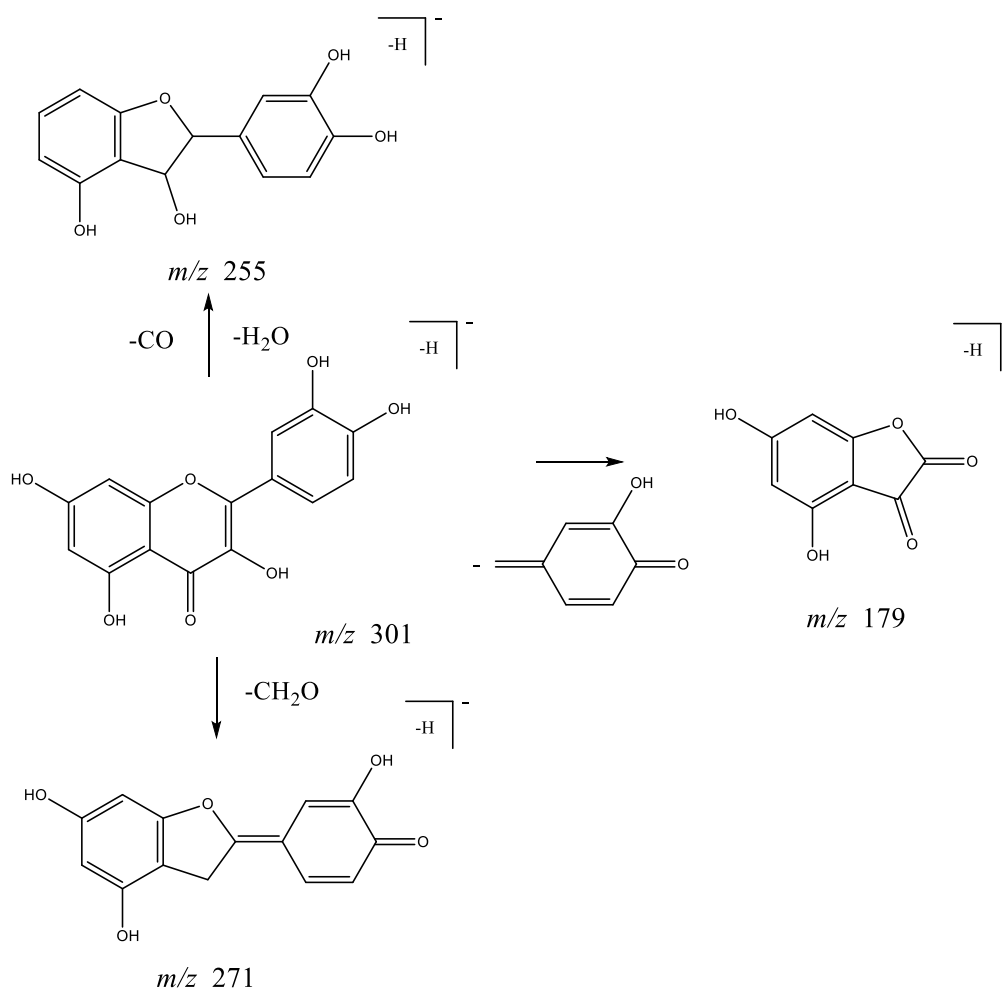

**Figure S6.** MS/MS fragmentation pattern of  $[M-H]^-$  at  $m/z$  301 identified as quercetin (9).
